# Supplementary material for: Comprehensive Analysis of Ecological Restoration Technologies in Typical Ecologically Vulnerable Regions around the World
Source: MDPI journal article supplement (doi:10.3390/su132313290), 2021-11-30
Supplement: s1 [file s1]

Archive with 5 entries (5 files):
- Literature Reserch Supplemental Text.pdf
- Supplemental Questionnaire.pdf
- Supplemental Table 1.pdf
- Supplemental Table 2.pdf
- Supplemental Table 3.pdf
