# Supplementary material for: Comprehensive Analysis of Ecological Restoration Technologies in Typical Ecologically Vulnerable Regions around the World
Source: MDPI journal article supplement (doi:10.3390/su132313290), 2021-11-30
Supplement: s1 [file s1 › Literature Reserch Supplemental Text.pdf]

1. Kusar, D.; Komac, B. A geographical and architectural perspective on Alpine hay meadow abandonment in Bohinj, Slovenia. *Eco Mont-Journal on Protected Mountain Areas Research*. 2019, 11(1), 32-42.
2. Hu, J.J.; Zhou, Q.P.; Lu, Y.H.; Lü Y.H.; Hu, J.; Chen, Y.J.; Gou, X. Comparison study to the effectiveness of typical ecological restoration measures in semi-humid sandy land in eastern Qinghai-Tibetan Plateau, China. *Acta Ecologica Sinica*. 2020, 40(20), 7410-7418. (in Chinese)
3. Wade, T.I.; Ndiaye, O.; Mauclaire, M.; Mbaye, B.; Sagna, M.; Guisse, A.; Goffner, D. Biodiversity field trials to inform reforestation and natural resource management strategies along the African Great Green Wall in Senegal. *New Forests*. 2018, 49(3), 341-362.
4. Akhmedenov, K. M. Analysis of the Afforestation Status in the Arid Conditions of Western Kazakhstan. *Biology Bulletin*. 2018, 45(10), 1153-1158.
5. Lopez-Vicente, M.; Wu, G. L. Soil and Water Conservation in Agricultural and Forestry Systems. *Water*. 2019, 11(09). <https://doi.org/10.3390/w11091937>.
6. Bai, L.C.; Wang, N.; Jiao, J.Y.; Chen, Y.X.; Tang, B.Z.; Wang, H.L.; Chen, Y.L.; Yan, X.Q.; Wang, Z.J. Soil erosion and sediment interception by check dams in a watershed for an extreme rainstorm on the Loess Plateau, China. *International Journal of Sediment Research*. 2020, 35(04), 408-416.
7. Helman, D.; Mussery, A. Using Landsat satellites to assess the impact of check dams built across erosive gullies on vegetation rehabilitation. *Science of the Total Environment*. 2020,(09), 730, 138873. <https://doi.org/10.1016/j.scitotenv.2020.138873>.
8. Toosi, A. S.; Tousi, E. G.; Ghassemi, S. A.; Cheshomi, A.; Alaghmand, S. A multi-criteria decision analysis approach towards efficient rainwater harvesting. *Journal of Hydrology*. 2020, 582, 124501. <https://doi.org/10.1016/j.jhydrol.2019.124501>.
9. Wen, X.; Zhen, L. Soil erosion control practices in the Chinese Loess Plateau: A systematic review. *Environmental Development*. 2020, 34, 100493.
10. Yang, F.; Wei, X.R.; Huang, M.B.; Li, C.H.; Zhao, X.F.; Zhang, Z.D. Spatiotemporal variability of soil organic carbon for different topographic and land use types in a gully watershed on the Chinese Loess Plateau. *Soil Research*. 2021, SR19317, <https://doi.org/10.1071/SR19317>.
11. Liu, Z.; Li, Q.M.; Lan, J.; Abu Hatab, A. Does participation in the sloping land conversion program reduce the sensitivity of Chinese farmers to climate change? *Land Use Policy*. 2020, 99, 105021. <https://doi.org/10.1016/j.landusepol.2020.105021>.
12. Phung, L.D.; Ichikawa, M.; Pham, D.V.; Sasaki, A.; Watanabe, T. High yield of protein-rich forage rice achieved by soil amendment with composted sewage sludge and topdressing with treated wastewater. *Scientific Reports*. 2020, 10(1), 2045-2322.
13. Ronkin, V.; Tokarsky, V.; Polchaninova, N.; Atemasov, A.; Koshkina, A.; Savchenko, G. Comparative Assessment of Ecological Plasticity of the Steppe Marmot Between Ukrainian and Kazakhstan Populations: Challenges of the Man-Induced Environmental Changes. *Frontiers in Ecology and Evolution*, 2020, 8, 00219. <https://doi.org/10.3389/fevo.2020.00219>.
14. Dou, Y.X.; Yang, Y.; An, S.S.; Zhu, Z.L. Effects of different vegetation restoration measures on soil aggregate stability and erodibility on the Loess Plateau, China. *Catena*. 2020, 185, 104294. <https://doi.org/10.1016/j.catena.2019.104294>.
15. Xu, H.J.; He, H.; Huang, S.L. Analysis of fractional vegetation cover change and its impact on thermal environment in the Hetian basinal area of County Changting, Fujian Province, China. *Acta Ecologica Sinica*. 2013, 33(10), 2954-2963. (in Chinese)
16. An, J.; Chang, H.N.; Han, S.H.; Khamzina, A.; Son, Y. Changes in basic soil properties and enzyme activities along an afforestation series on the dry Aral Sea Bed, Kazakhstan. *Forest Science and Technology*. 2020, 16(01), 26-31.
17. Zou, X.; Zhu, X.A.; Chen, C.F.; Liu, W. J. Soil and water conservation benefits of agroforestry systems. *Journal of Yunnan University(Natural Sciences Edition)*. 2020, 42(02), 382-392. (in Chinese)
18. Yengwe, J.; Amalia, O.; Lungu, O.I.; De Neve, S. Quantifying nutrient deposition and yield levels of maize (*Zea mays*) under *Faidherbia albida* agroforestry system in Zambia. *European Journal of Agronomy*. 2018, 99(08), 148-155.
19. Li, X.B.; Kang, Y.H.; Wang, X.M. Response of soil properties and vegetation to reclamation period using drip irrigation in coastal saline soils of the Bohai Gulf. *Paddy and Water Environment*. 2019, 17(04), 803-812.

20. Zhang, W.T.; Sheng, J.D.; Li, Z.; Weindorf, D.C.; Hu, G.Q.; Xuan, J.W.; Zhao, H.M. Integrating rainwater harvesting and drip irrigation for water use efficiency improvements in apple orchards of northwest China. *Scientia Horticulture*. 2021, 275, 109728. <https://doi.org/10.1016/j.scienta.2020.109728>.
21. Laskar, S.Y.; Sileshi, G.W.; Pathak, K.; Debnath, N.; Nath, A.J.; Laskar, K.Y.; Singnar, P.; Das, A.K. Variations in soil organic carbon content with chronosequence, soil depth and aggregate size under shifting cultivation. *Science of The Total Environment*. 2021, 762, 143114. <https://doi.org/10.1016/j.scitotenv.2020.143114>.
22. Cao, S.X.; Suo, X.H.; Xia, C.Q. Payoff from afforestation under the Three-North Shelter Forest Program. *Journal of Cleaner Production*. 2020, 256. <https://doi.org/10.1016/j.jclepro.2020.120461>.
23. Hu, P.L.; Zhang, W.; Chen, H.S.; Li, D.J.; Zhao, Y.; Zhao, J.; Xiao, J.; Wu, F.J.; He, X.Y.; Luo, Y.Q. Soil carbon accumulation with increasing temperature under both managed and natural vegetation restoration in calcareous soils. *Science of The Total Environment*. 2021, 767, 145298. <https://doi.org/10.1016/j.scitotenv.2021.145298>.
24. Chen, T.; Tang, G.P.; Yuan, Y.; Guo, H.; Xu, Z.W.; Jiang, G.; Chen, X.H. Unraveling the relative impacts of climate change and human activities on grassland productivity in Central Asia over last three decades. *Science of The Total Environment*. 2020, 743, 140649. <https://doi.org/10.1016/j.scitotenv.2020.140649>.
