# Supplementary material for: Comprehensive Analysis of Ecological Restoration Technologies in Typical Ecologically Vulnerable Regions around the World
Source: MDPI journal article supplement (doi:10.3390/su132313290), 2021-11-30
Supplement: s1 [file s1 › Supplemental Questionnaire.pdf]

## QUESTIONNAIRE FOR ASSESSMENT OF ECOLOGICAL RESTORATION TECHNOLOGY

### Background:

We are implementing a Chinese national key Research and Development Program entitled “Methods and indicator systems for assessing ecological restoration technology, and evaluation of ecosystem rehabilitation approaches from around the world (2016-2021)”. The main objectives are to identify and evaluate promising ecological restoration technology (RT) from China and the representative countries for combating desertification, soil and water erosion and restoring degraded ecosystems (e.g. degraded grassland, forest, farmland and wetland, etc.), in order to identify most appropriate RT for regions with specific needs.

The purpose of this survey is to explore and assess the existing RT that are used in your study area and identify the technological needs for future restoration.

Your cooperation is very much appreciated. Thank you very much!

**Please return the questionnaire to email addresses listed below:**

Prof Dr. Lin Zhen (Project Leader)

E-mail: [zhenl@igsnr.ac.cn](mailto:zhenl@igsnr.ac.cn)

Ms. Shuang Wang

E-mail: [wangs.17s@igsnr.ac.cn](mailto:wangs.17s@igsnr.ac.cn)

### Affiliation:

Institute of Geographic Science and Natural Resources Research ([www.igsnr.ac.cn](http://www.igsnr.ac.cn))

Chinese Academy of Sciences

11A Datun Road, Chaoyang District

Beijing 100101, PR China

---

### Please provide your information as below:

Name: \_\_\_\_\_ Title: \_\_\_\_\_ Country: \_\_\_\_\_

Affiliation: \_\_\_\_\_

Research interests: \_\_\_\_\_

E-mail: \_\_\_\_\_

### 1. Please write the name and location of your study area, where ecological degradation exists:

Name of the study area: \_\_\_\_\_

|                 |             |                  |                 |
|-----------------|-------------|------------------|-----------------|
|                 |             | Longitude: _____ | Latitude: _____ |
| Location: _____ | Town: _____ | City: _____      | Country: _____  |

**2. In aforementioned study area, what is the main degradation issue, associated driving factors, ecological restoration technologies (RT) currently applied? Please assess these RT, and recommend most appropriate RT that should be used.**

| Degradation issue<br>(chose ONE most serious issue existing in your study area)                                                                                                                                                              | Driving factors (tick all that apply)                                                                                                                                                                         | Name of already applied RT (list 2 RT) | Evaluation of this RT (refer to Notes under the table for explanations)<br>(Score: 1=very low, 2=low, 3=moderate, 4=high, 5=very high) |       | Describe unsolved degradation problem by current RT in your study area (as specific as possible) | What are other technologies do you recommend, apart from already applied RT (list 2, as specific as possible) | Describe functions of recommended RT (as specific as possible) |
|----------------------------------------------------------------------------------------------------------------------------------------------------------------------------------------------------------------------------------------------|---------------------------------------------------------------------------------------------------------------------------------------------------------------------------------------------------------------|----------------------------------------|----------------------------------------------------------------------------------------------------------------------------------------|-------|--------------------------------------------------------------------------------------------------|---------------------------------------------------------------------------------------------------------------|----------------------------------------------------------------|
|                                                                                                                                                                                                                                              |                                                                                                                                                                                                               |                                        | Criteria                                                                                                                               | Score |                                                                                                  |                                                                                                               |                                                                |
| <b>1.Sandy Desertification</b><br><br><b>2. Soil and water erosion</b><br><br><b>3. Degraded ecosystems</b> (Specify, e.g.,<br>- degraded grassland<br>- degraded forest<br>- degraded farmland<br>- degraded wetland<br>- others (specify)) | <b>A</b> -Drought<br><b>B</b> -Wind<br><b>C</b> -Water erosion<br><b>D</b> -Chemical deterioration<br><b>E</b> -Overgrazing<br><b>F</b> -Intensive farming<br><b>G</b> -Mining<br><b>H</b> -Others (specify): | <b>Name of RT 1:</b>                   | Readiness <sup>a</sup>                                                                                                                 |       |                                                                                                  | <b>Name of recommended RT 1:</b>                                                                              |                                                                |
|                                                                                                                                                                                                                                              |                                                                                                                                                                                                               |                                        | Easy to use <sup>b</sup>                                                                                                               |       |                                                                                                  |                                                                                                               |                                                                |
|                                                                                                                                                                                                                                              |                                                                                                                                                                                                               |                                        | Suitability <sup>c</sup>                                                                                                               |       |                                                                                                  |                                                                                                               |                                                                |
|                                                                                                                                                                                                                                              |                                                                                                                                                                                                               |                                        | Effectiveness <sup>d</sup>                                                                                                             |       |                                                                                                  |                                                                                                               |                                                                |
|                                                                                                                                                                                                                                              |                                                                                                                                                                                                               |                                        | Potential to transfer <sup>e</sup>                                                                                                     |       |                                                                                                  |                                                                                                               |                                                                |
|                                                                                                                                                                                                                                              |                                                                                                                                                                                                               | <b>Name of RT 2:</b>                   | Readiness                                                                                                                              |       |                                                                                                  | <b>Name of recommended RT 2:</b>                                                                              |                                                                |
|                                                                                                                                                                                                                                              |                                                                                                                                                                                                               |                                        | Easy to use                                                                                                                            |       |                                                                                                  |                                                                                                               |                                                                |
|                                                                                                                                                                                                                                              |                                                                                                                                                                                                               |                                        | Suitability                                                                                                                            |       |                                                                                                  |                                                                                                               |                                                                |
|                                                                                                                                                                                                                                              |                                                                                                                                                                                                               |                                        | Effectiveness                                                                                                                          |       |                                                                                                  |                                                                                                               |                                                                |
|                                                                                                                                                                                                                                              |                                                                                                                                                                                                               |                                        | Potential to transfer                                                                                                                  |       |                                                                                                  |                                                                                                               |                                                                |

<sup>a</sup> **Readiness:** refers to the integrity and stability level, development and application level, or maturity level of this restoration technology.

<sup>b</sup> **Easy to use:** refers to the skills' requirement for using this restoration technology.

<sup>c</sup> **Suitability:** refers to the degree of consistency between this RT application and regional development goals, natural conditions, policy and demands, etc.

<sup>d</sup> **Effectiveness:** refers to the ecological, economic and social effects from using this restoration technology.

<sup>e</sup> **Potential to transfer:** refers to the possibility of transferring this restoration technology to other regions.
