# Supplementary material for: Comprehensive Analysis of Ecological Restoration Technologies in Typical Ecologically Vulnerable Regions around the World
Source: MDPI journal article supplement (doi:10.3390/su132313290), 2021-11-30
Supplement: s1 [file s1 › Supplemental Table 1.pdf]

Table S1 Application and evaluation of approaches to combat soil erosion in typical regions

| Category of restoration technology | Name of restoration technology                       | Technical Evaluation  |             |           |               |             |                  |
|------------------------------------|------------------------------------------------------|-----------------------|-------------|-----------|---------------|-------------|------------------|
|                                    |                                                      | Potential to transfer | Easy to use | Readiness | Effectiveness | Suitability | Evaluation index |
| Biological                         | Forest/Grass Pest Control                            | 4.00                  | 5.00        | 5.00      | 5.00          | 5.00        | 0.96             |
|                                    | Forest improvement                                   | 5.00                  | 4.50        | 4.50      | 4.50          | 5.00        | 0.94             |
|                                    | Plant breeding                                       | 3.50                  | 4.50        | 5.00      | 4.50          | 5.00        | 0.90             |
|                                    | Aerial Seeding                                       | 5.00                  | 3.00        | 4.00      | 5.00          | 5.00        | 0.88             |
|                                    | Spatial allocation of trees, shrubs and herbs plants | 5.00                  | 3.00        | 4.00      | 5.00          | 5.00        | 0.88             |
|                                    | Protective/Buffering forests                         | 4.50                  | 3.75        | 4.25      | 4.25          | 4.25        | 0.84             |
|                                    | Hedgerows                                            | 4.50                  | 3.50        | 5.00      | 4.00          | 4.00        | 0.84             |
|                                    | Salt-tolerant plant species selection                | 5.00                  | 3.00        | 4.00      | 4.00          | 5.00        | 0.84             |
|                                    | Artificial afforestation/grassland                   | 4.20                  | 4.25        | 4.20      | 4.24          | 4.09        | 0.84             |
|                                    | Straw mulching                                       | 5.00                  | 3.00        | 4.00      | 3.00          | 3.00        | 0.72             |
| Engineering                        | Plastic mulching                                     | 3.00                  | 2.00        | 3.00      | 4.00          | 3.00        | 0.60             |
|                                    | Storage reservoir                                    | 4.00                  | 5.00        | 5.00      | 5.00          | 5.00        | 0.96             |
|                                    | Terraced slopes                                      | 4.50                  | 4.00        | 5.00      | 4.50          | 5.00        | 0.92             |
|                                    | Multiple-drop check dam                              | 5.00                  | 4.00        | 4.00      | 4.00          | 5.00        | 0.88             |
|                                    | Solid waste backfilling                              | 4.00                  | 4.00        | 5.00      | 4.00          | 5.00        | 0.88             |
|                                    | Grain for green                                      | 4.33                  | 4.50        | 4.50      | 3.67          | 4.50        | 0.86             |
|                                    | Sewage water treatment                               | 3.50                  | 4.50        | 5.00      | 4.00          | 4.00        | 0.84             |
|                                    | Greening concrete slope protection                   | 5.00                  | 4.00        | 4.00      | 4.00          | 4.00        | 0.84             |
|                                    | Environment-friendly soil stabilizer                 | 5.00                  | 3.00        | 3.00      | 5.00          | 5.00        | 0.84             |
|                                    | Retaining walls                                      | 4.00                  | 3.00        | 4.50      | 4.50          | 4.50        | 0.82             |
|                                    | Riverbed sludge dredging                             | 4.00                  | 3.00        | 3.00      | 5.00          | 5.00        | 0.80             |
|                                    | Terraces                                             | 4.33                  | 2.80        | 4.12      | 3.82          | 3.91        | 0.76             |
|                                    | Stone dikes                                          | 3.00                  | 4.00        | 4.00      | 3.00          | 4.00        | 0.72             |
|                                    | Check dams                                           | 2.90                  | 3.87        | 4.00      | 3.40          | 3.57        | 0.71             |
|                                    | Subdrainage                                          | 2.00                  | 4.00        | 4.00      | 4.00          | 3.00        | 0.68             |
| Agricultural                       | Runoff-interception                                  | 3.00                  | 2.00        | 3.00      | 3.00          | 3.00        | 0.56             |
|                                    | Intercepting ditches                                 |                       |             |           |               |             |                  |
|                                    | Agro-forestry                                        | 4.25                  | 4.75        | 4.75      | 4.75          | 4.50        | 0.92             |
|                                    | Fallow/No-tillage/                                   |                       |             |           |               |             |                  |
|                                    | Minimum tillage                                      | 4.67                  | 4.33        | 5.00      | 4.00          | 4.33        | 0.89             |
|                                    | Stereo-agriculture                                   | 4.25                  | 3.50        | 4.25      | 4.75          | 5.00        | 0.87             |
|                                    | Conservation tillage                                 | 4.00                  | 4.50        | 5.00      | 4.00          | 4.00        | 0.86             |

|            |                                                |      |      |      |      |      |      |
|------------|------------------------------------------------|------|------|------|------|------|------|
| Management | Soil reclamation/fertilization                 | 4.67 | 3.67 | 4.00 | 4.00 | 4.33 | 0.83 |
|            | Drip irrigation                                | 3.50 | 4.50 | 4.00 | 4.00 | 4.50 | 0.82 |
|            | Contour strip farming                          | 4.00 | 3.00 | 4.00 | 4.50 | 4.00 | 0.78 |
|            | Strip farming                                  | 3.00 | 3.00 | 4.00 | 3.00 | 4.00 | 0.68 |
|            | Groundwater irrigation                         | 2.00 | 3.00 | 2.00 | 5.00 | 4.00 | 0.64 |
|            | Establish nature reserves                      | 4.00 | 3.00 | 5.00 | 5.00 | 5.00 | 0.88 |
|            | Grazing exclosures                             | 4.00 | 4.67 | 4.67 | 4.00 | 4.33 | 0.87 |
|            | Confined/semi-confined farming                 | 4.00 | 3.50 | 4.50 | 4.50 | 4.75 | 0.85 |
|            | Using Grass to Settle Livestock                | 4.00 | 3.00 | 5.00 | 5.00 | 4.00 | 0.84 |
|            | Forest harvest regulation                      | 4.00 | 3.00 | 5.00 | 4.00 | 5.00 | 0.84 |
|            | Natural restoration                            | 4.00 | 4.00 | 5.00 | 3.00 | 4.00 | 0.80 |
|            | Participatory seedling and planting management | 3.00 | 5.00 | 4.00 | 4.00 | 4.00 | 0.80 |
|            | Forest protection legislation                  | 3.00 | 3.00 | 4.00 | 4.00 | 4.00 | 0.72 |
|            | Prohibiting/Rest/Rotational grazing            | 2.53 | 3.47 | 3.40 | 4.20 | 3.40 | 0.68 |
|            | Prescribed burning of vegetation               | 2.00 | 4.00 | 4.00 | 3.00 | 3.00 | 0.64 |
