# Supplementary material for: Comprehensive Analysis of Ecological Restoration Technologies in Typical Ecologically Vulnerable Regions around the World
Source: MDPI journal article supplement (doi:10.3390/su132313290), 2021-11-30
Supplement: s1 [file s1 › Supplemental Table 2.pdf]

Table S2 Application and evaluation of approaches to combat sandy desertification in typical regions

| Category of restoration technology | Name of restoration technology                 | Technical Evaluation  |             |           |               |             |                  |
|------------------------------------|------------------------------------------------|-----------------------|-------------|-----------|---------------|-------------|------------------|
|                                    |                                                | Potential to transfer | Easy to use | Readiness | Effectiveness | Suitability | Evaluation index |
| Biological                         | Plant breeding                                 | 4.33                  | 4.50        | 4.67      | 4.67          | 4.50        | 0.91             |
|                                    | Protective/Buffering forests                   | 4.00                  | 4.00        | 4.00      | 5.00          | 5.00        | 0.88             |
|                                    | Aerial Seeding                                 | 4.00                  | 3.00        | 4.00      | 5.00          | 4.50        | 0.82             |
|                                    | Windbreak and Sand Fixation                    | 4.83                  | 3.00        | 4.17      | 3.83          | 3.83        | 0.79             |
|                                    | Forest                                         |                       |             |           |               |             |                  |
|                                    | Reseeding                                      | 4.00                  | 4.00        | 3.00      | 4.00          | 4.00        | 0.76             |
|                                    | Artificial afforestation/grass                 | 3.52                  | 3.10        | 3.69      | 4.00          | 3.81        | 0.72             |
|                                    | Biological soil crusts                         | 4.00                  | 3.00        | 2.00      | 4.00          | 3.50        | 0.66             |
|                                    | Hedgerows                                      | 3.00                  | 4.00        | 2.00      | 3.00          | 4.00        | 0.64             |
| Engineering                        | Straw checkerboard                             | 4.50                  | 4.30        | 4.95      | 4.65          | 4.75        | 0.93             |
|                                    | Check dams                                     | 5.00                  | 4.00        | 4.00      | 5.00          | 5.00        | 0.92             |
|                                    | Mechanical+biological sand barriers            | 5.00                  | 3.00        | 4.00      | 5.00          | 5.00        | 0.88             |
|                                    | Scale ripples                                  | 4.00                  | 1.00        | 5.00      | 5.00          | 5.00        | 0.80             |
|                                    | Grain for green                                | 4.00                  | 4.00        | 5.00      | 3.00          | 4.00        | 0.80             |
|                                    | Intercepting ditch                             | 3.00                  | 1.00        | 5.00      | 5.00          | 5.00        | 0.76             |
|                                    | Contour lines of “V”                           | 3.00                  | 3.00        | 4.00      | 3.00          | 4.00        | 0.68             |
|                                    | aqueducts preserve soil moisture               |                       |             |           |               |             |                  |
|                                    | Stone checker                                  | 3.00                  | 2.00        | 3.00      | 3.00          | 4.00        | 0.60             |
|                                    | Runoff catchment                               | 3.00                  | 2.00        | 3.00      | 3.00          | 4.00        | 0.60             |
|                                    | Rainwater harvesting                           | 3.00                  | 2.00        | 3.00      | 3.00          | 3.00        | 0.56             |
|                                    |                                                |                       |             |           |               |             |                  |
| Agricultural                       | Water-saving Irrigation                        | 4.00                  | 5.00        | 5.00      | 4.00          | 5.00        | 0.92             |
|                                    | Conservation tillage                           | 4.00                  | 4.00        | 4.00      | 5.00          | 5.00        | 0.88             |
|                                    | Agro--grassland                                | 4.33                  | 2.67        | 4.33      | 4.33          | 4.00        | 0.79             |
|                                    | Fallow/No-tillage/Minimum tillage              | 3.50                  | 4.00        | 5.00      | 3.00          | 4.00        | 0.78             |
|                                    | Stereo-agriculture                             | 3.00                  | 4.00        | 4.00      | 4.00          | 4.00        | 0.76             |
|                                    | Soil reclamation/fertilizing                   | 3.50                  | 2.50        | 4.50      | 4.00          | 3.50        | 0.72             |
|                                    |                                                |                       |             |           |               |             |                  |
| Management                         | Grazing enclosures                             | 4.72                  | 4.61        | 4.33      | 4.78          | 4.56        | 0.92             |
|                                    | Community-herdsmen joint management mechanisms | 5.00                  | 4.50        | 4.50      | 3.50          | 4.00        | 0.86             |
|                                    | Confined/semi-confined farming                 | 5.00                  | 3.00        | 3.00      | 5.00          | 5.00        | 0.84             |
|                                    | Prohibiting/Rest/Rotational grazing            | 4.43                  | 4.17        | 4.30      | 3.47          | 4.23        | 0.82             |
|                                    | Community participatory management             | 3.00                  | 4.00        | 4.00      | 3.00          | 4.00        | 0.72             |
|                                    |                                                |                       |             |           |               |             |                  |

|                     |      |      |      |      |      |      |
|---------------------|------|------|------|------|------|------|
| Natural restoration | 3.50 | 3.50 | 2.50 | 3.50 | 3.50 | 0.66 |
|---------------------|------|------|------|------|------|------|
