# Supplementary material for: Comprehensive Analysis of Ecological Restoration Technologies in Typical Ecologically Vulnerable Regions around the World
Source: MDPI journal article supplement (doi:10.3390/su132313290), 2021-11-30
Supplement: s1 [file s1 › Supplemental Table 3.pdf]

Table S3 Application and evaluation of approaches to combat degraded ecosystem in typical regions

| Category of restoration technology | Name of restoration technology                    | Technical Evaluation  |             |           |               |             |                  |
|------------------------------------|---------------------------------------------------|-----------------------|-------------|-----------|---------------|-------------|------------------|
|                                    |                                                   | Potential to transfer | Easy to use | Readiness | Effectiveness | Suitability | Evaluation index |
| Biological                         | Aerial Seeding                                    | 3.00                  | 4.00        | 4.00      | 5.00          | 4.00        | 0.80             |
|                                    | Protective/Buffering forests                      | 3.17                  | 3.67        | 4.33      | 3.83          | 4.33        | 0.77             |
|                                    | Artificial afforestation/<br>grass                | 3.94                  | 3.68        | 3.67      | 4.05          | 3.98        | 0.77             |
|                                    | Plant breeding                                    | 3.00                  | 2.89        | 4.33      | 4.11          | 4.78        | 0.76             |
|                                    | Fruit tree plantations                            | 3.33                  | 2.67        | 3.67      | 4.33          | 3.00        | 0.68             |
| Engineering                        | Solid waste backfilling                           | 5.00                  | 5.00        | 5.00      | 5.00          | 4.00        | 0.96             |
|                                    | Riverbed sludge dredging                          | 4.00                  | 5.00        | 5.00      | 4.00          | 5.00        | 0.92             |
|                                    | Mechanical+biological sand<br>barriers            | 4.00                  | 4.00        | 3.00      | 5.00          | 5.00        | 0.84             |
|                                    | Straw checkerboards                               | 4.00                  | 4.00        | 4.50      | 4.00          | 4.50        | 0.84             |
|                                    | Grain for green                                   | 4.50                  | 4.00        | 5.00      | 2.50          | 5.00        | 0.84             |
|                                    | Check dams                                        | 5.00                  | 5.00        | 3.50      | 4.00          | 3.50        | 0.84             |
|                                    | Terraces                                          | 2.00                  | 4.00        | 5.00      | 4.00          | 5.00        | 0.80             |
|                                    | Rainwater harvesting                              | 4.00                  | 4.00        | 3.00      | 5.00          | 4.00        | 0.80             |
|                                    | Storage reservoirs                                | 3.00                  | 3.00        | 2.00      | 4.00          | 3.00        | 0.60             |
|                                    | Stereo-agriculture                                | 4.50                  | 4.50        | 4.50      | 4.50          | 5.00        | 0.92             |
| Agricultural                       | Agro-forestry                                     | 4.25                  | 3.50        | 3.25      | 3.75          | 3.75        | 0.74             |
|                                    | Contour strip farming                             | 4.00                  | 2.00        | 1.00      | 4.00          | 4.00        | 0.60             |
|                                    | Groundwater irrigation                            | 4.00                  | 2.50        | 2.00      | 2.00          | 1.50        | 0.48             |
|                                    | Fallow/No-tillage/<br>Minimum tillage             | 1.00                  | 2.00        | 1.00      | 3.00          | 2.00        | 0.36             |
|                                    | Prohibiting/Rest/Rotational<br>grazing            | 3.60                  | 4.70        | 4.10      | 4.90          | 4.10        | 0.86             |
|                                    | Ecological compensation                           | 4.00                  | 5.00        | 2.00      | 5.00          | 4.00        | 0.80             |
| Management                         | Grazing exclosure                                 | 3.70                  | 4.20        | 3.70      | 3.50          | 3.90        | 0.76             |
|                                    | Using Grass to Settle<br>Livestock                | 2.00                  | 3.00        | 4.00      | 4.00          | 5.00        | 0.72             |
|                                    | Natural restoration                               | 3.50                  | 3.00        | 4.00      | 2.50          | 4.00        | 0.68             |
|                                    | Participatory forest<br>management                | 3.00                  | 3.00        | 4.00      | 3.00          | 3.00        | 0.64             |
|                                    | Improving land management<br>laws and regulations | 1.00                  | 2.00        | 1.00      | 2.00          | 2.00        | 0.32             |
|                                    |                                                   |                       |             |           |               |             |                  |
|                                    |                                                   |                       |             |           |               |             |                  |
